# Supplementary material
Source: PubMed Central journal article supplement (PMC2981435)
Supplement: NIHMS224615-supplement-supplementary_data.pdf [file NIHMS224615-supplement-supplementary_data.pdf]

# Supplemental Figure 1

## SPM2 VBM Analysis Pipeline

### Template Creation Process

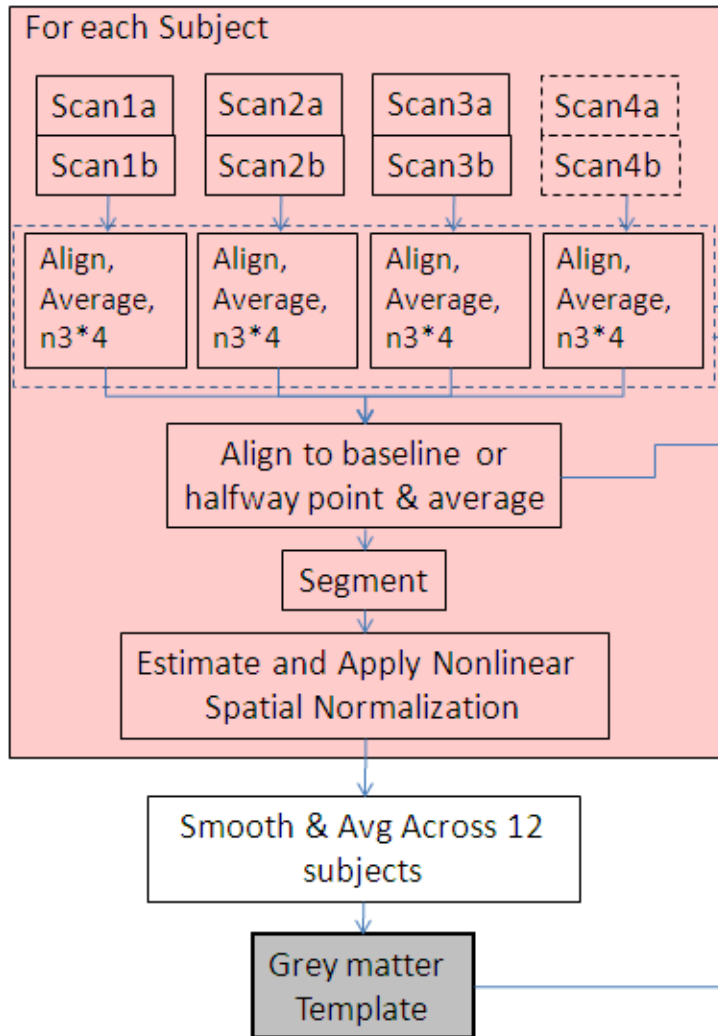

### Scan Comparison Process

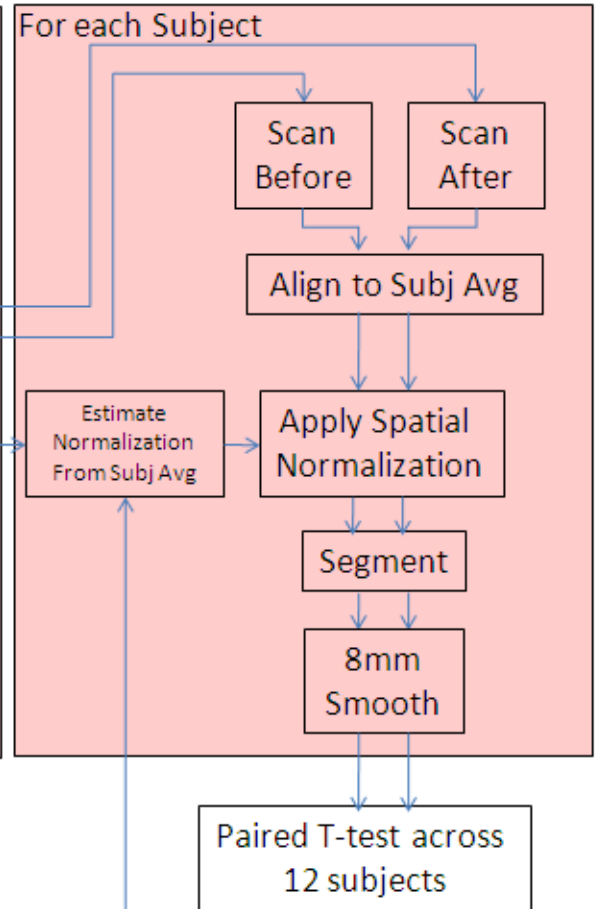

# Supplemental Figure 2

## FSL VBM Analysis Pipeline

### Template Creation Process

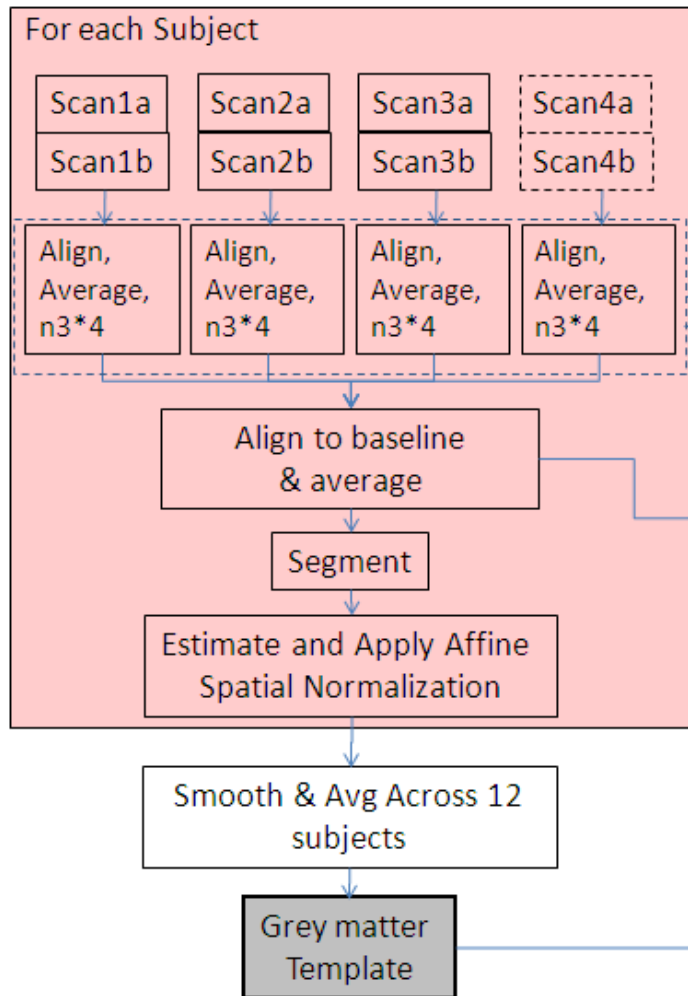

### Scan Comparison Process

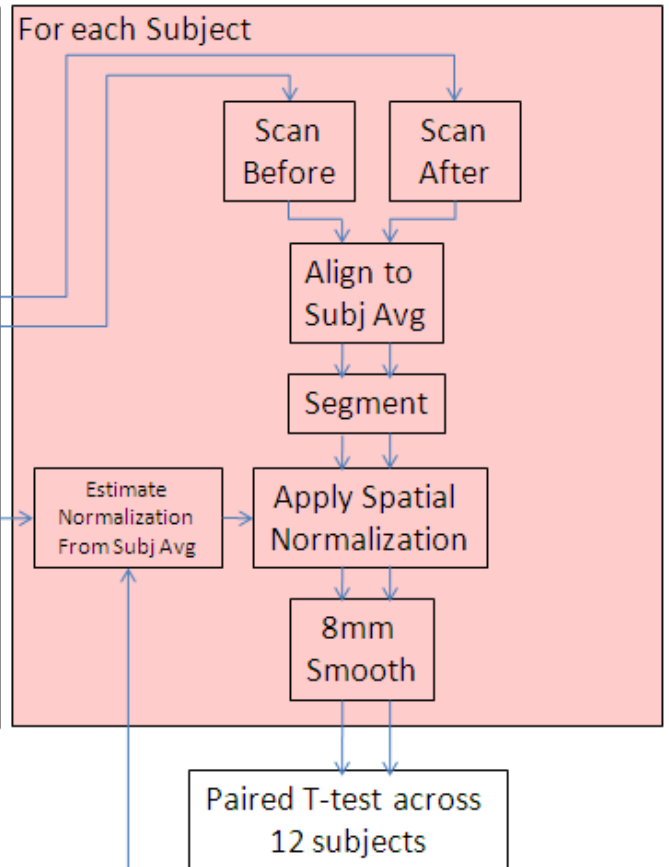

### Supplemental Figure 3

## SPM5 VBM Analysis Pipeline

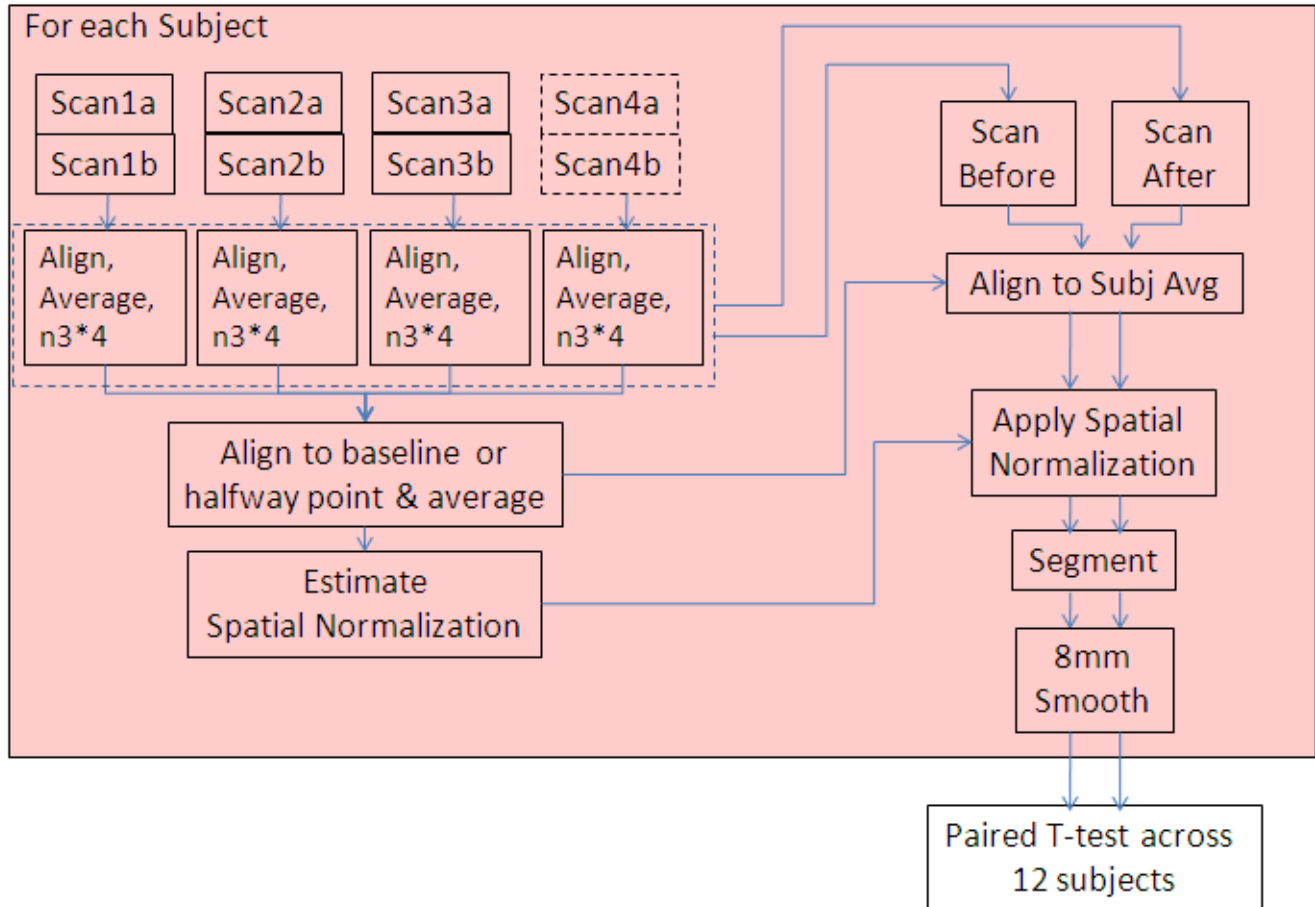

**Supplemental Figure 4**

**Voxels in regions of increased activity**

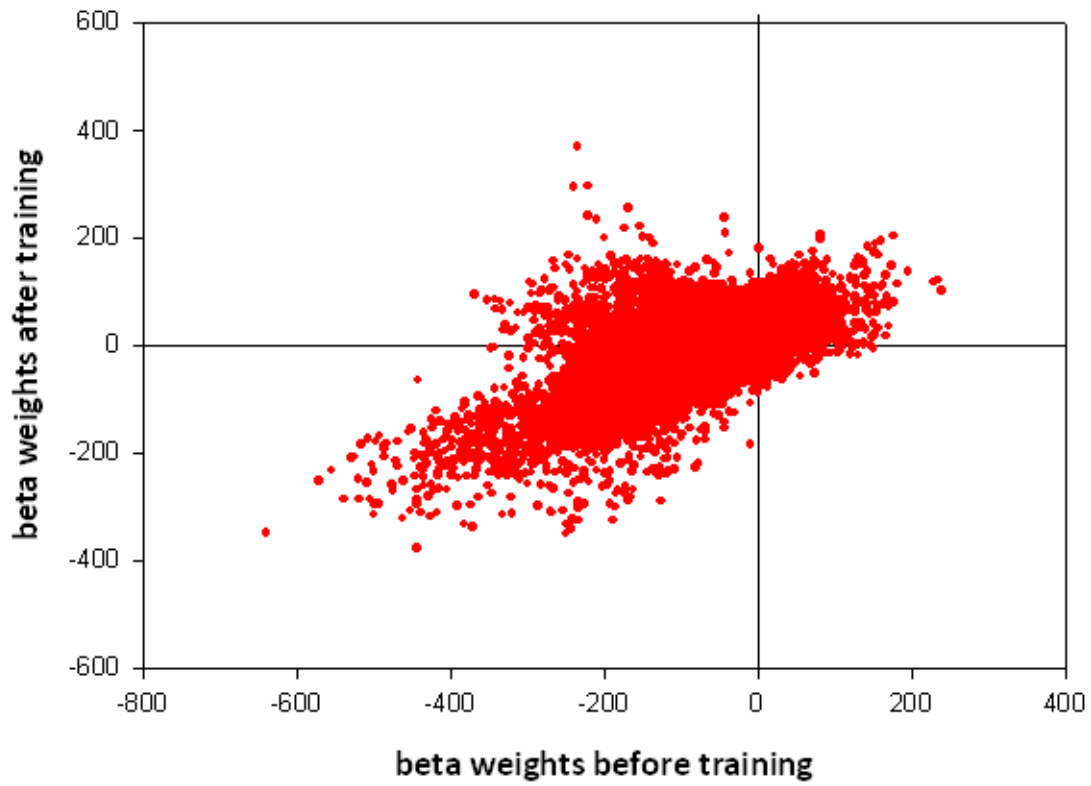

**Voxels in regions of decreased activity**

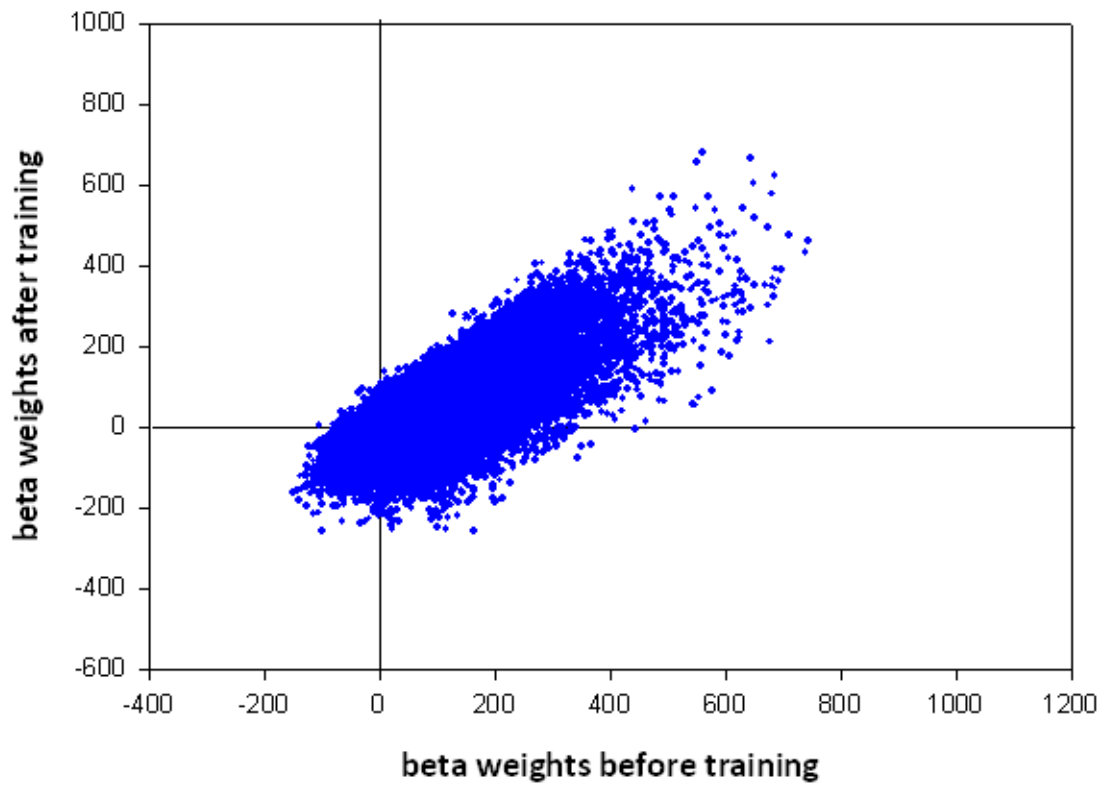

Supplemental Figure 4 Caption: The beta weights for all voxels from the first level analyses of each subject are plotted here. Beta weight before training are plotted against beta weights after training. Voxels in areas that showed a relative increase in the group analysis are plotted in top graph and voxels that showed a relative decrease in the group analysis are plotted in the bottom graph. It is apparent from the top graph that the majority of the voxels in areas of increased activation were deactivated relative to baseline before training (83.6%) and a large fraction (54%) remained deactivated after training. In contrast, most of the voxels in areas of decreased activation were primarily activated relative to baseline before (92.3%) and after (73.7%) training. Note that these graphs depict pre-selected voxels and are included for descriptive purposes only. No inferences may be drawn (Kriegeskorte et al., 2009, Nature Neuroscience).

## Supplemental Table 1 - Clusters of Grey Matter Change

|                                   | Control Period |         |     |     |     |                   | Learning Period |         |     |     |     |                       |
|-----------------------------------|----------------|---------|-----|-----|-----|-------------------|-----------------|---------|-----|-----|-----|-----------------------|
|                                   | P-value        | #voxels | x   | y   | z   | Area              | P-value         | #voxels | x   | y   | z   | Area                  |
| SPM2 - Aligned to Baseline Scan   | No Clusters    |         |     |     |     |                   | 0.004           | 394     | -6  | -67 | -6  | L. Primary Visual     |
|                                   |                |         |     |     |     |                   | 0.003           | 4       | 28  | -13 | 65  | R. Precentral Gyrus   |
| SPM2- Aligned to Pretraining Scan | 0.034          | 65      | 7   | 50  | 43  | R. Medial Frontal | 0.032           | 562     | -20 | -65 | -51 | L. Cerebellum         |
| SPM2 - Aligned to Halfway Scan    | No Clusters    |         |     |     |     |                   | No Clusters     |         |     |     |     |                       |
| FSL - Aligned to Baseline Scan    | 0.005          | 308     | -33 | -33 | -11 | L. Hippocampus    | 0.0007          | 2790    | 0   | 33  | 29  | Paracingulate Gyrus   |
|                                   | 0.007          | 256     | 31  | -40 | -9  | R. Lingual Gyrus  | 0.01            | 220     | 40  | 20  | -6  | R. Insula             |
|                                   | 0.001          | 771     | 1   | 24  | 39  | R. Paracingulate  | 0.03            | 109     | 3   | -38 | 53  | R. Precuneus          |
|                                   | 0.02           | 135     | 0   | 49  | 12  | L. Paracingulate  | 0.04            | 82      | 33  | 38  | -18 | R. Frontal Pole       |
|                                   | 0.02           | 128     | 44  | 13  | -4  | R. Insula         | 0.04            | 75      | -23 | 33  | 44  | L. Sup. Frontal Gyrus |
|                                   | 0.04           | 83      | 1   | -55 | 48  | R. Precuneus      |                 |         |     |     |     |                       |
| FSL - Aligned to Halfway Scan     | No Clusters    |         |     |     |     |                   | >0.0001         | 2       | 56  | -8  | -43 | R. Inferior Temporal  |
| FSL - with randomise 2.1          | No Clusters    |         |     |     |     |                   | No Clusters     |         |     |     |     |                       |
| SPM5                              | No Clusters    |         |     |     |     |                   | No Clusters     |         |     |     |     |                       |

Supplementary Table 1 Caption: P-values, sizes, coordinates and areas of each cluster found in each VBM analysis are provided. Clusters of grey matter increase are printed in red. Clusters of grey matter decrease are printed in blue. Voxel coordinates are reported in MNI space and area labels were determined using the Harvard-Oxford Structural Atlas in FSLview (Flitney et al., 2008). Note that all clusters reported here were ultimately determined to be artifactual.
